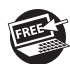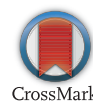

# Erratum

**Pharmacokinetics and Pharmacodynamics of High-Dose Human Regular U-500 Insulin Versus Human Regular U-100 Insulin in Healthy Obese Subjects. *Diabetes Care* 2011;34:2496–2501**

DOI: 10.2337/dc14-er08

In the Supplementary Data of the article cited above, there is an error in Supplementary Fig. 2. The data point label for  $tR_{max}$  (beneath the x-axis) “ $tR_{max}$  = time of half-maximum GIR” should read “ $tR_{max}$  = time of maximum GIR.” In addition, the block blue color that fills the area under the curve should not extend beyond the x-axis. The corrected Supplementary Fig. 2 appears below. The online version reflects these changes.

Amparo de la Peña, Matthew Riddle, Linda A. Morrow, Honghua H. Jiang, Helle Linnebjerg, Adam Scott, Khin M. Win, Marcus Hompesch, Kenneth F. Mace, Jennie G. Jacobson, and Jeffrey A. Jackson

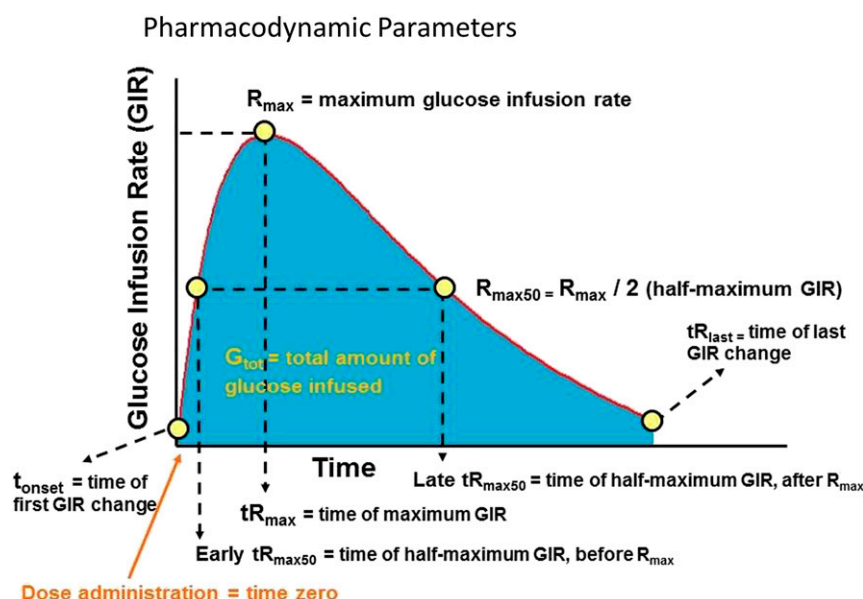

Source: https://ada.silverchair.com/care/article-pdf/37/8/2414/623182/2414.pdf
